# Supplementary material
Source: Springer Nature journal article supplement (https://www.springermedizin.de/resource/supplementary/12906_2010_314_MOESM5_ESM.pdf/9519402)

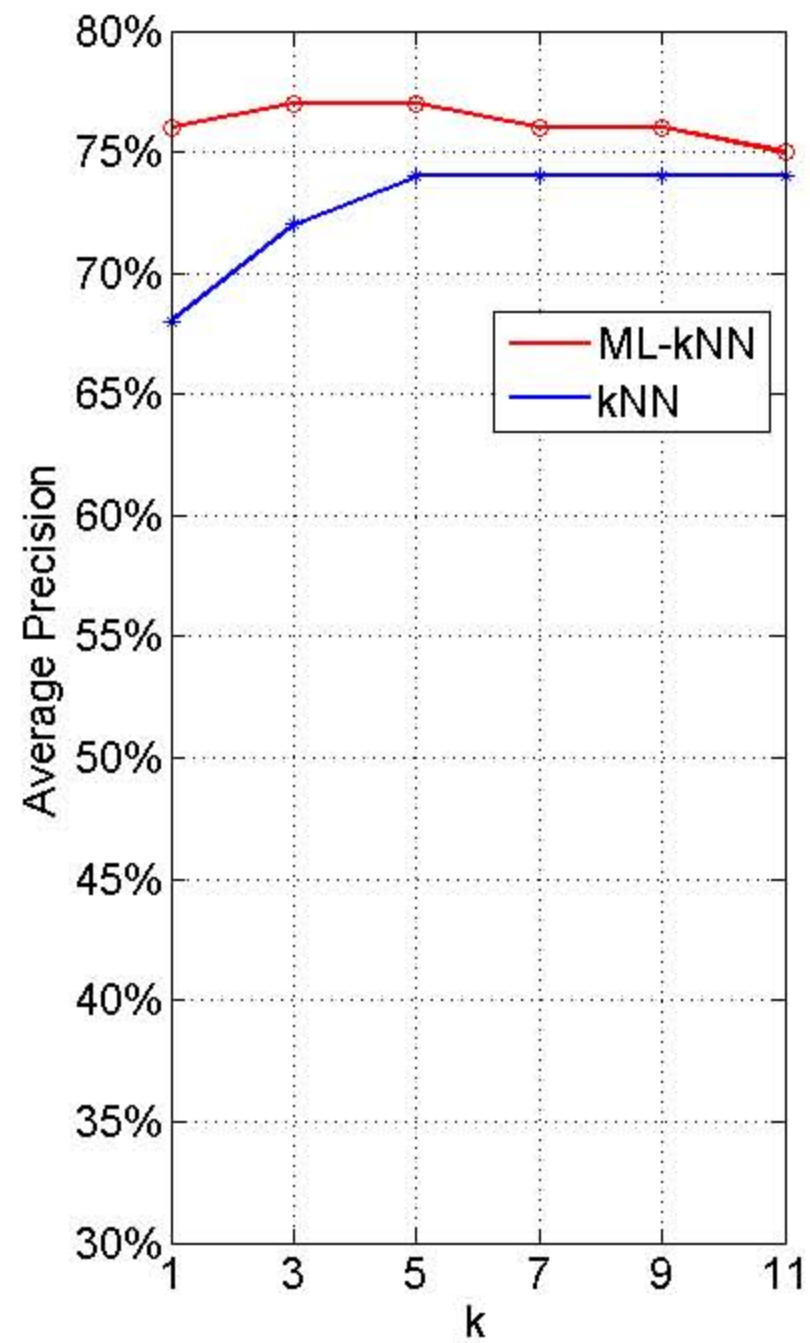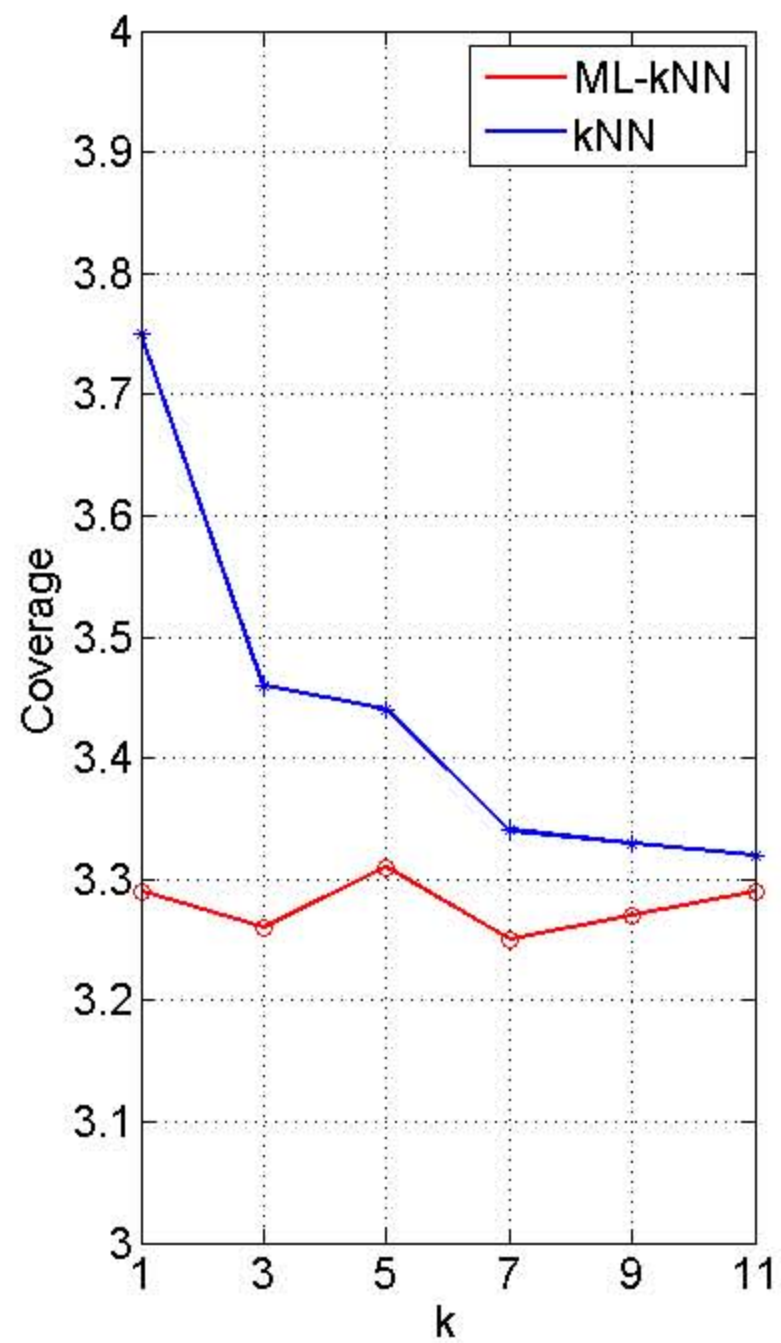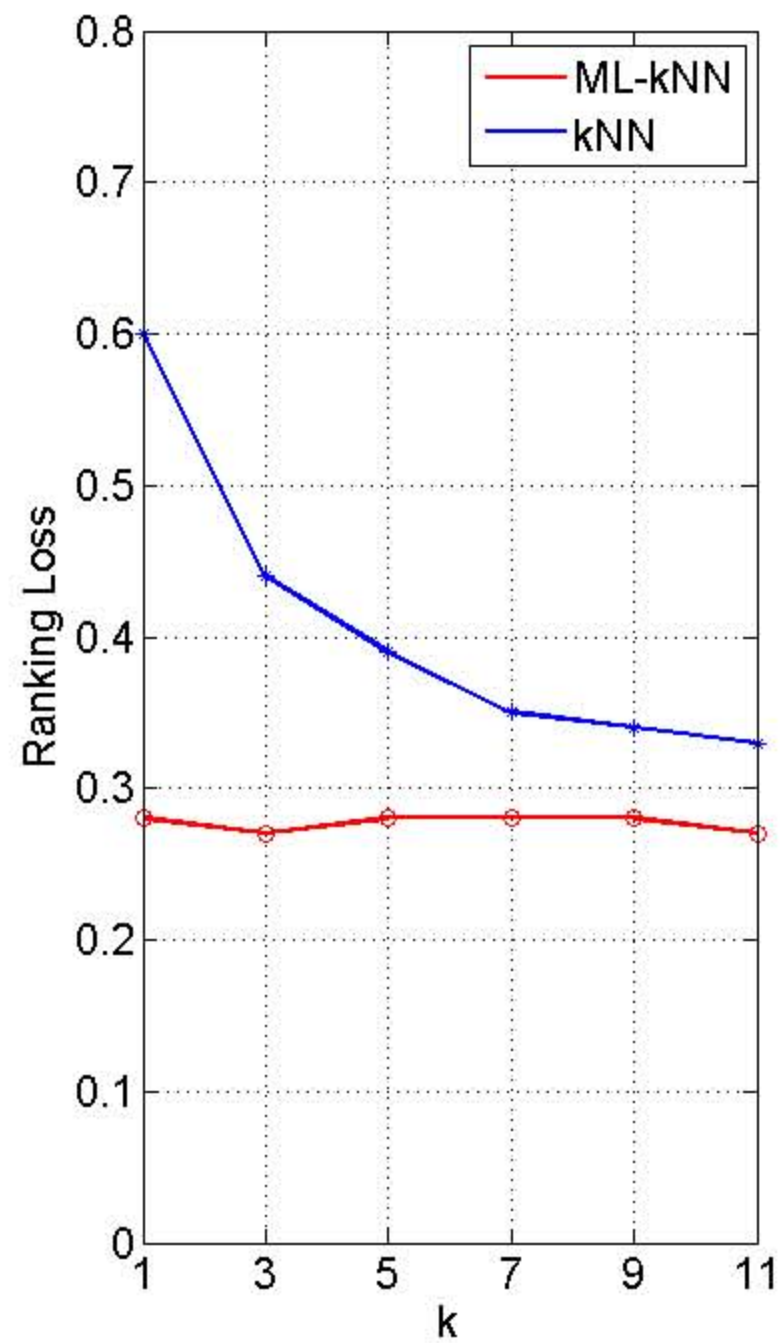

Supplement: MOESM5 [file 9519402]
